# Supplementary material
Source: publisher figshare collection journal article supplement (https://acs.figshare.com/ndownloader/files/5154709)

## Supporting Information

### A Table of Contents

- S-1:** Experimental Procedures for the Acid-hydrolysis of  $^{15}\text{N}_3$ -Labeled **2a**, the Chemical Conversion of the  $\text{N}_3$ -*O*-Benzylated 4-Iminouridine (**3**) to **2a**, and Pd/C-Reduction of Uridine 4-*O*-Benzyloxime (**2a**).
- S-2:** IR, UV,  $^1\text{H}$  NMR, FAB-Mass, and HRFAB-Mass of Cytidine  $\text{N}_3$ -Oxide (**1a**).
- S-3:** IR, UV,  $^1\text{H}$  NMR, FAB-Mass, and HRFAB-Mass of 2'-Deoxycytidine  $\text{N}_3$ -Oxide (**1b**).
- S-4:** IR, UV,  $^1\text{H}$  NMR, FAB-Mass, and HRFAB-Mass of Uridine 4-*O*-Benzyloxime (**2a**).
- S-5:** IR,  $^1\text{H}$  NMR, FAB-Mass, and HRFAB-Mass of  $^{15}\text{N}_3$ -Labeled Uridine 4-*O*-Benzyloxime ( $^{15}\text{N}_3$ -Labeled **2a**).
- S-6:** IR, UV,  $^1\text{H}$  NMR, and FAB-Mass of 2'-Deoxyuridine 4-*O*-Benzyloxime (**2b**).
- S-7:**  $^1\text{H}$  NMR, FAB-Mass, and HRFAB-Mass of  $^{15}\text{N}_3$ -Labeled 2'-Deoxyuridine 4-*O*-Benzyloxime ( $^{15}\text{N}_3$ -Labeled **2b**).
- S-8:** UV,  $^1\text{H}$  NMR, FAB-Mass, and HRFAB-Mass of  $^{15}\text{N}_3$ -Labeled Cytidine.
- S-9:** UV,  $^1\text{H}$  NMR, FAB-Mass, and HRFAB-Mass of  $^{15}\text{N}_3$ -Labeled 2'-Deoxycytidine.
- S-10:** IR, UV,  $^1\text{H}$  NMR, FAB-Mass, and HRFAB-Mass of  $\text{N}_3$ -*O*-Benzylated 4-Iminouridine (**3**).
- S-11:** IR, UV,  $^1\text{H}$  NMR, FAB-Mass, and HRFAB-Mass of  $\text{N}_3$ -*O*-Benzylated Uridine (**4**).
- S-12:** UV,  $^1\text{H}$  NMR, FAB-Mass, and HRFAB-Mass of  $^{15}\text{N}_3$ -Labeled Uridine.

## S-1

**General:** Melting points are uncorrected.  $^1\text{H}$  NMR spectra were obtained at 400 MHz using  $\text{DMSO-}d_6$  (unless otherwise noted) as the solvent. Column chromatography was performed on silica gel (Cica Merck No. 9385; silica gel 60; 230-400 mesh). For the thin-layer chromatographic (TLC) analyses, Merck precoated TLC plates (Merck No. 5715; silica gel 60-F<sub>254</sub>) were used. According to a previously reported procedure, the  $^{15}\text{N}^4$ -labeled cytidine and  $^{15}\text{N}^4$ -labeled 2'-deoxycytidine were prepared using  $^{15}\text{N}$ -enriched benzamide (99 atom%  $^{15}\text{N}$ , Isotec, Inc.) and the appropriate unprotected uridines as the starting materials.<sup>3</sup> Unless otherwise noted, the materials obtained from commercial suppliers were used without further purification.

**Acid-hydrolysis of  $^{15}\text{N}_3$ -Labeled Uridine 4-*O*-Benzyloxime ( $^{15}\text{N}_3$ -Labeled **2a**).** A solution of the labeled oxime ( $^{15}\text{N}_3$ -labeled **2a**) (17.5 mg, 0.05 mmol) in methanol-1N HCl (1/1) (2.0 mL) was stirred at 60°C overnight. After being neutralized with 1N NaOH and subsequent removal of the solvent under reduced pressure, the resulting residue was subjected to a silica gel short column by eluting with chloroform-methanol (5/1) to isolate the  $^{15}\text{N}_3$ -labeled 1-(3,4-dihydroxy-5-hydroxymethyltetrahydrofuran-2-yl)-1*H*-pyrimidin-2,4-dione (uridine) <sup>7</sup> (trituated with acetone, 10.0 mg, 81%); UV (MeOH): 264 and 208 nm;  $^1\text{H}$  NMR: identical to the data for uridine, except  $\delta$  11.31 (1H, br d,  $J$ = ~90) ppm; HR-FABMS  $m/z$ : 246.0753 [calcd for  $\text{C}_9\text{H}_{13}\text{N}^{15}\text{NO}_6$  ( $\text{MH}^+$ ): 246.0744].

**Conversion of the  $\text{N}_3$ -*O*-Benzylated 4-Iminouridine (**3**) to the Uridine 4-*O*-Benzyloxime (**2a**).** A solution of the 4-iminouridine **3** (10.5 mg, 0.03 mmol) in dry methanol or acetonitrile (1.0 mL) containing lithium hydride (Aldrich, 95% purity) (1.0 mg, 0.12 mmol) was stirred at 37°C

overnight under an argon atmosphere. TLC analyses of the reaction mixtures using chloroform-methanol (10/1 and 3/1) as the developing solvents showed the complete conversion of the starting **3** to the uridine 4-*O*-benzyloxime **2a** when using methanol as the solvent and the complete recovery of the starting **3** in the case of acetonitrile.

**Pd/C-Reduction of the Uridine 4-*O*-Benzyloxime (2a).** To a suspension of the uridine oxime (**2a**) (25 mg, 0.07 mmol) in dry methanol (1.0 mL) was added 10% Pd/C (2.5 mg), and the mixture was stirred vigorously at 60°C for 1 h under a hydrogen atmosphere. TLC analyses of the reaction mixture using chloroform-methanol-acetic acid (16/6/3) and chloroform-methanol (10/1) as the developing solvents showed the complete conversion of the starting **2a** to two polar products. After removal of the solvent under reduced pressure, the resulting residue was subjected to silica gel column by eluting with chloroform-methanol (5/1 to 3/1) to isolate cytidine and uridine 4-oxime in 77% and 22% yields, respectively. The structure of the uridine 4-oxime was confirmed by spectral comparison with the authentic compound which was independently prepared by the reaction of cytidine with hydroxylamine.<sup>Ref.</sup>

<sup>Ref.</sup> Brown, D. M.; Shell, P. J. *Chem. Soc.* **1965**, 208-215.

S-2: IR, UV,  $^1\text{H}$  NMR, FAB-Mass, and HRFAB-Mass of Cytidine  $N_3$ -Oxide (**1a**).

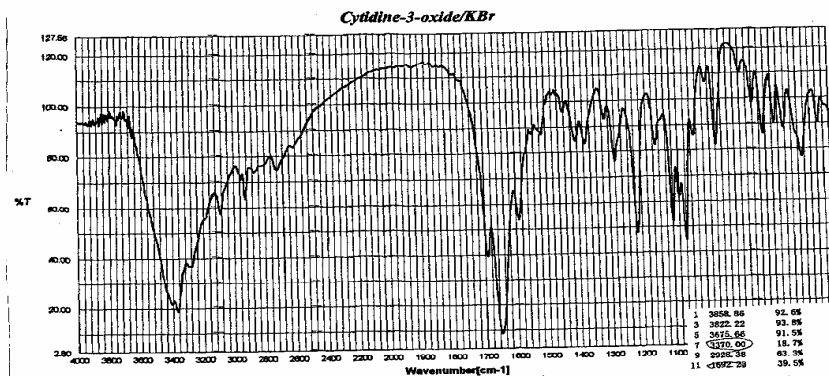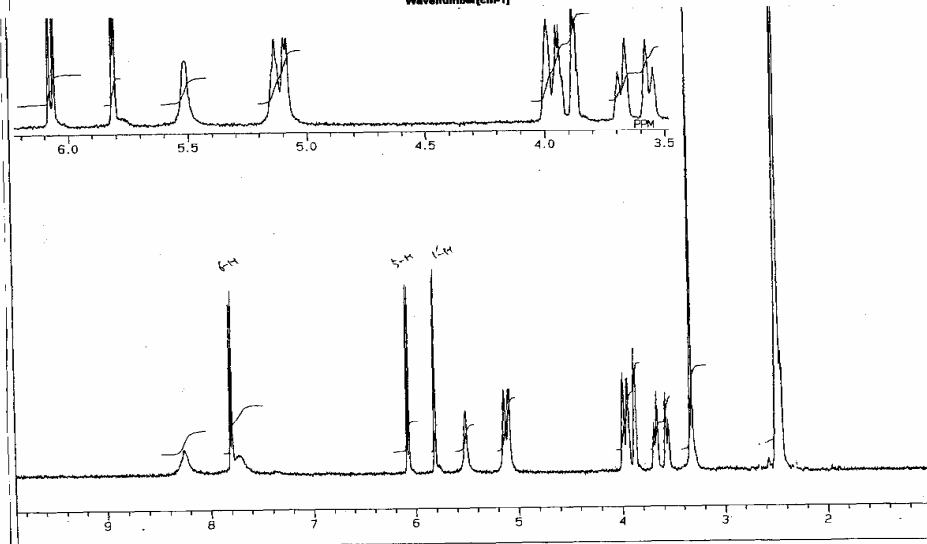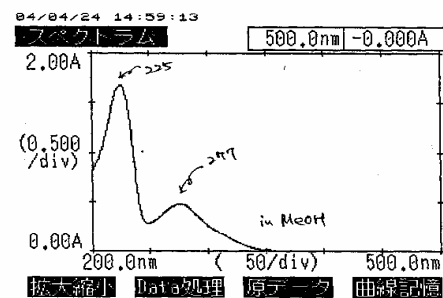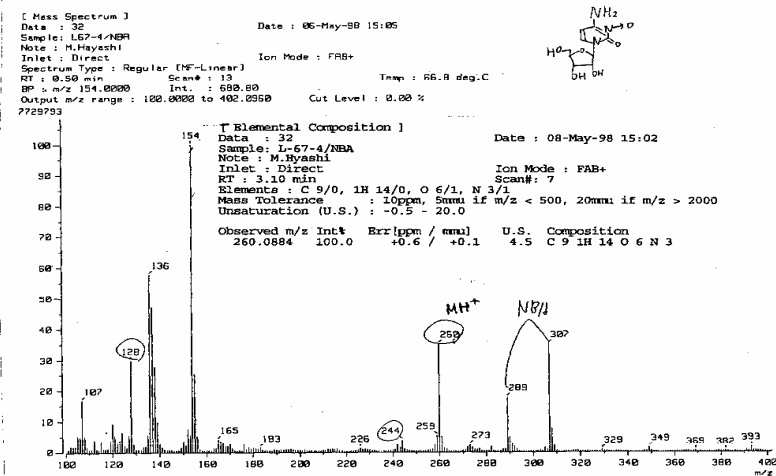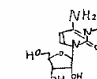

S-3: IR, UV,  $^1\text{H}$  NMR, FAB-Mass, and HRFAB-Mass of 2'-Deoxycytidine  $\text{N}_3$ -Oxide (**1b**).

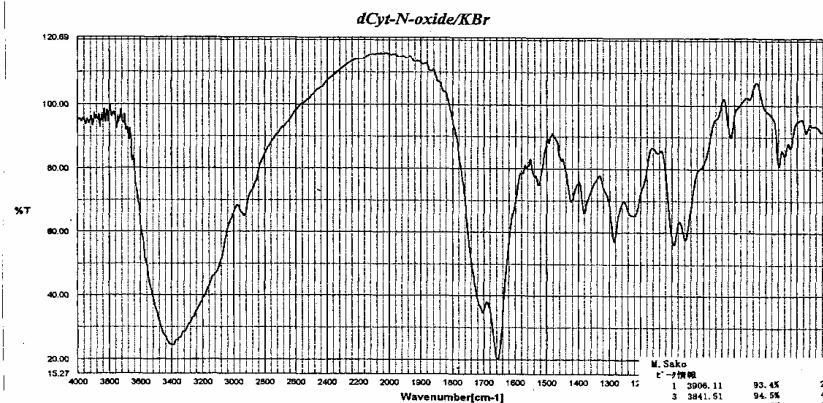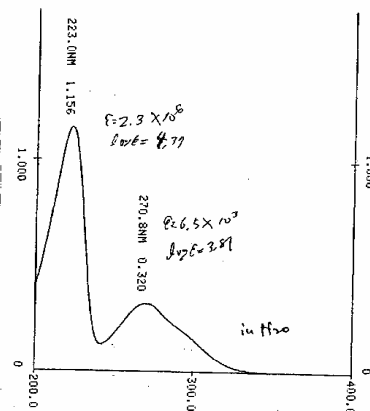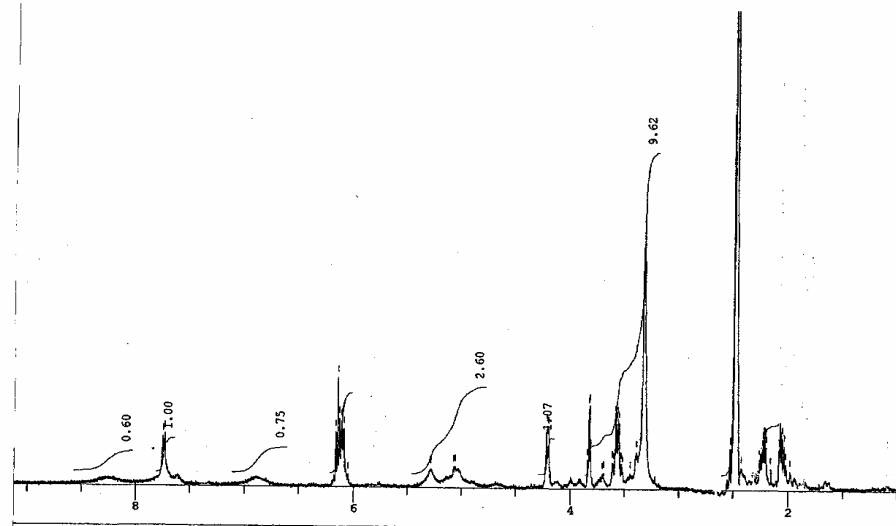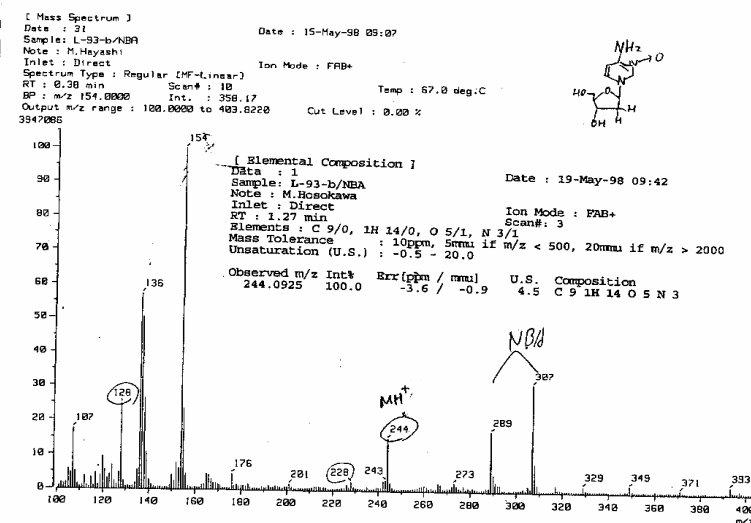

S-4: IR, UV,  $^1\text{H}$  NMR, FAB-Mass, and HRFAB-Mass of Uridine 4-*O*-Benzyloxime (2a).

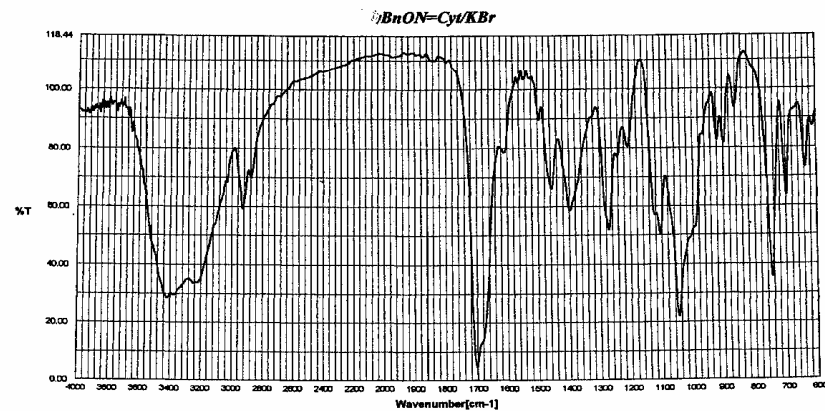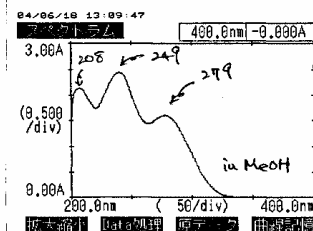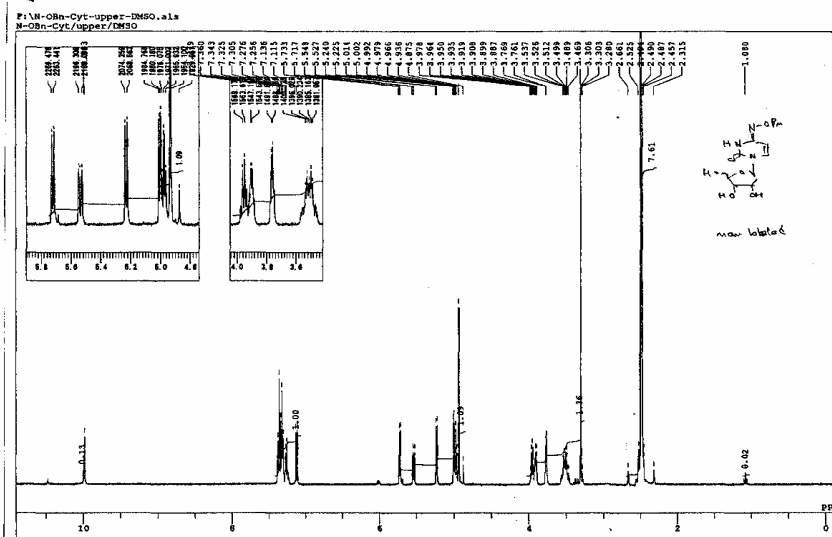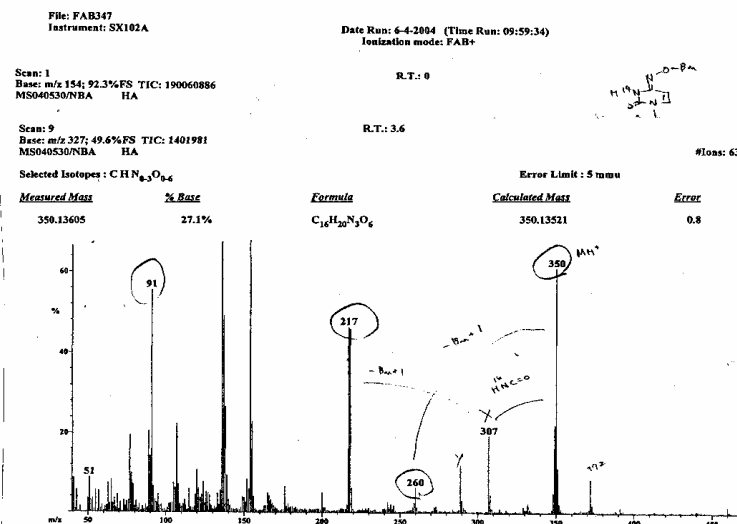

S-5: IR,  $^1\text{H}$  NMR, FAB-Mass, and HRFAB-Mass of  $^{15}\text{N}_3$ -Labeled Uridine 4-*O*-Benzyloxime ( $^{15}\text{N}_3$ -Labeled **2a**).

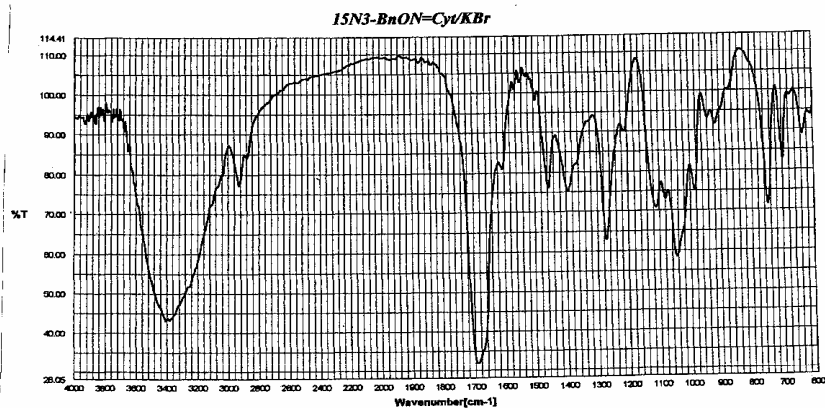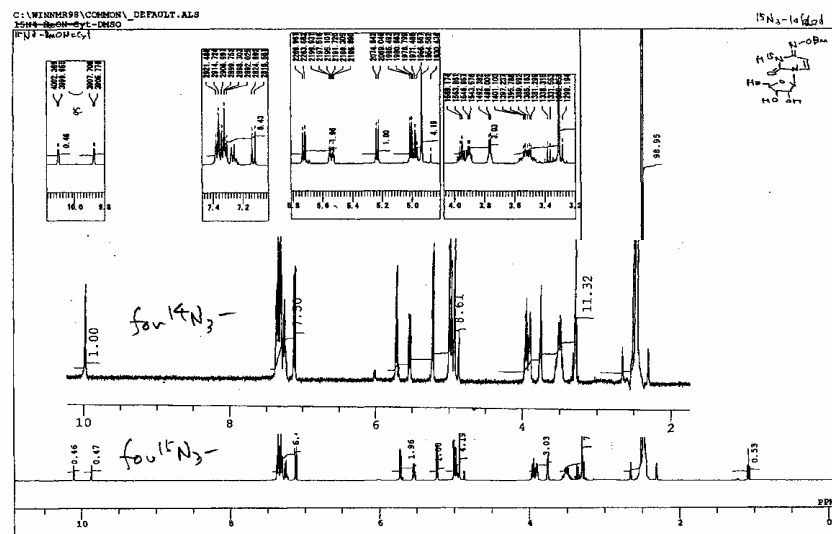

File: FAB349  
Instrument: SX102A

Date Run: 6-4-2004 (Time Run: 10:07:04)  
Ionization mode: FAB+

Scan: 1  
Base: m/z 154; 96.7%FS TIC: 251702482  
MS040531/NBA HA

R.T.: 0

Scan: 8  
Base: m/z 327; 50.6%FS TIC: 1401971  
MS040531/NBA HA

R.T.: 3.15

Selected Isotopes:  $\text{C}_8\text{H}_{10}\text{N}_3^{15}\text{N}_3\text{O}_4$

Error Limit: 5 mmu

| Measured Mass | % Base |
|---------------|--------|
| 351.13283     | 24.0%  |

| Formula                                                         | Calculated Mass | Error |
|-----------------------------------------------------------------|-----------------|-------|
| $\text{C}_{16}\text{H}_{10}\text{N}_3^{15}\text{N}_3\text{O}_4$ | 351.13225       | 0.6   |

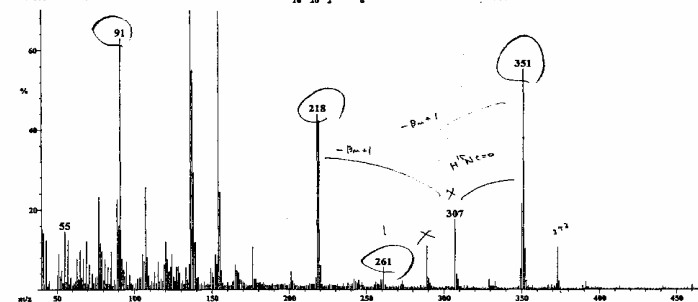

S-6: IR, UV,  $^1\text{H}$  NMR, and FAB-Mass of 2'-Deoxyuridine 4-O-Benzoyloxime (**2b**).

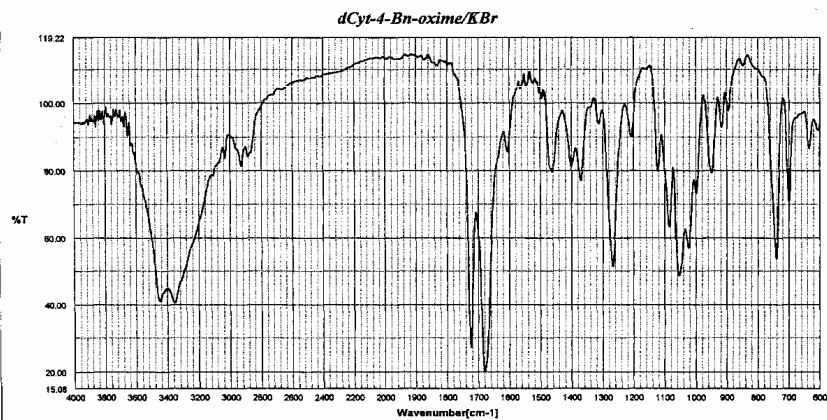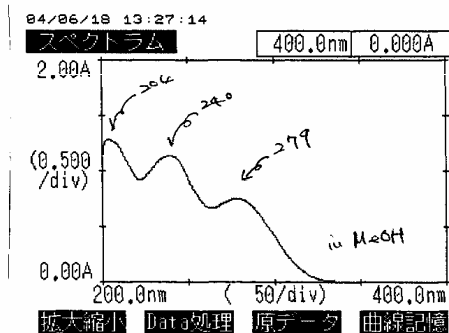

File: FAB411  
 Instrument: SX102A

Date Run: 6-15-2004 (Time Run: 14:10:27)  
 Ionization mode: FAB+

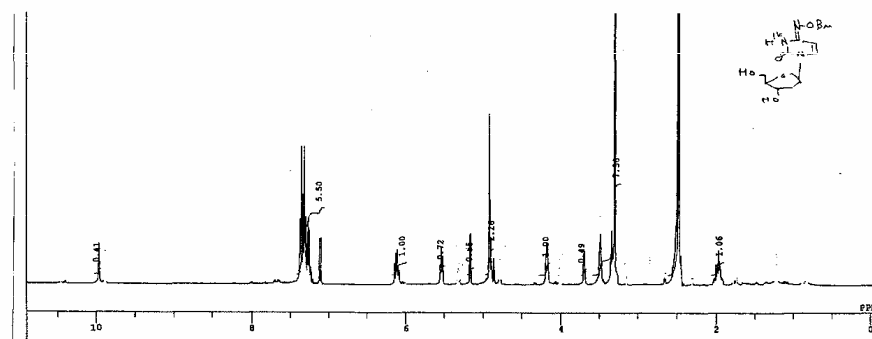



S-7:  $^1\text{H}$  NMR, FAB-Mass, and HRFAB-Mass of  $^{15}\text{N}_3$ -Labeled 2'-Deoxyuridine 4-*O*-Benzyloxime ( $^{15}\text{N}_3$ -Labeled **2b**).

C:\WINNMR99\DATA\15-N3-1\15N3-NORn-dCyt-DM50-040614.a1s  
15N3-NORn-dCyt/DM50

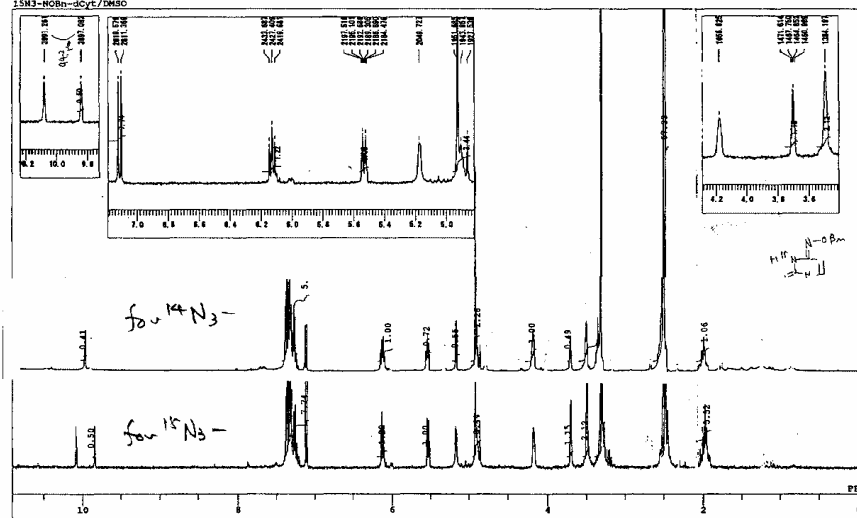

File: FAB413  
Instrument: SX102A

Date Run: 6-15-2004 (Time Run: 14:17:19)  
Ionization mode: FAB+

Scan: 1  
Base: m/z 154; 87%FS TIC: 306263345  
MS040615-1/NBA HA

R.T.: 0

#Ions: 1231

Scan: 4  
Base: m/z 327; 75.7%FS TIC: 2119837  
MS040615-1/NBA HA

R.T.: 1.35

#Ions: 55

Selected Isotopes:  $\text{CH}_2\text{N}_3^{15}\text{N}_3\text{O}_5$

Error Limit: 5 mmu

Measured Mass: 335.13853  
% Base: 25.8%

Formula:  $\text{C}_{10}\text{H}_{10}\text{N}_5\text{O}_5$

Calculated Mass: 335.13733

Error: 1.2

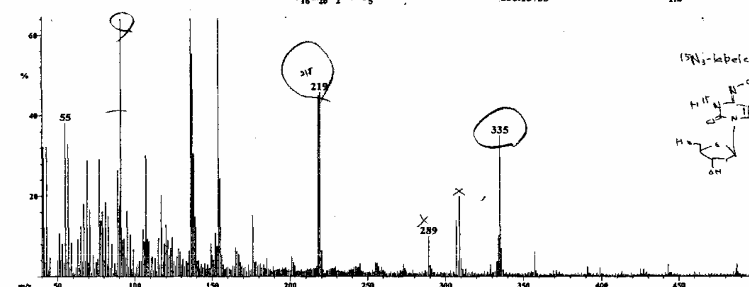

S-8: UV,  $^1\text{H}$  NMR, FAB-Mass, and HRFAB-Mass of  $^{15}\text{N}_3$ -Labeled Cytidine.

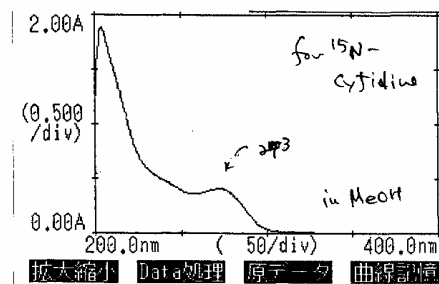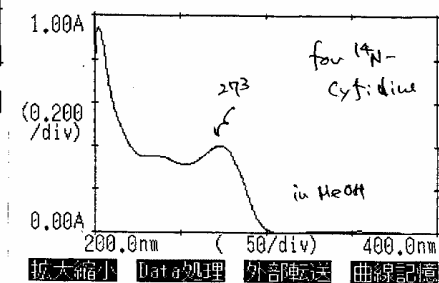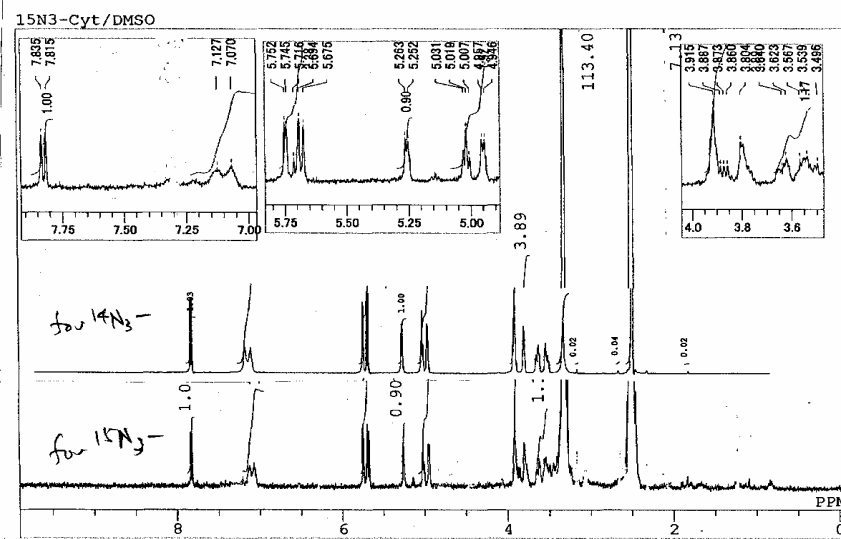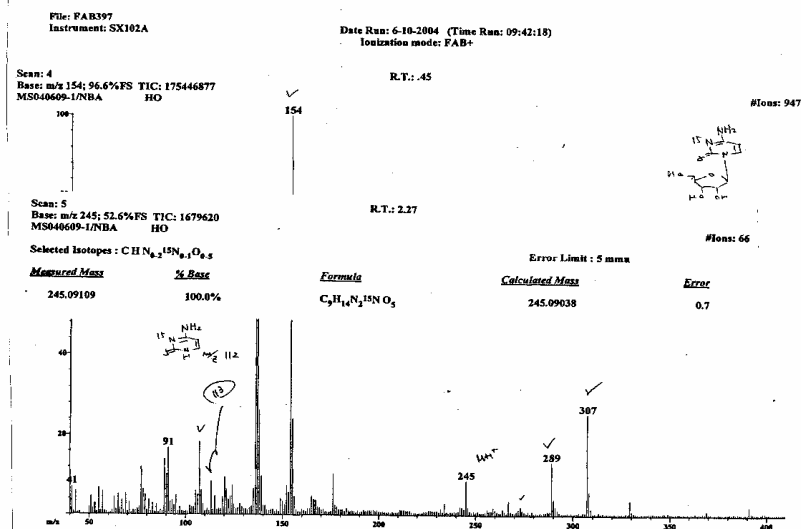

S-9: UV,  $^1\text{H}$  NMR, FAB-Mass, and HRFAB-Mass of  $^{15}\text{N}_3$ -Labeled 2'-Deoxycytidine.

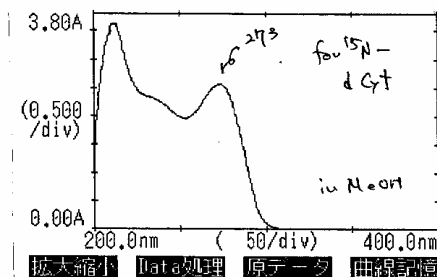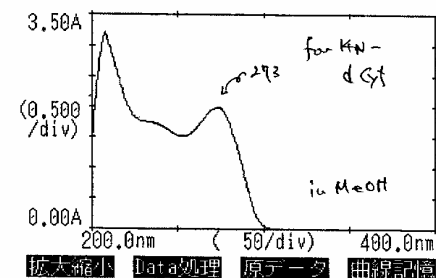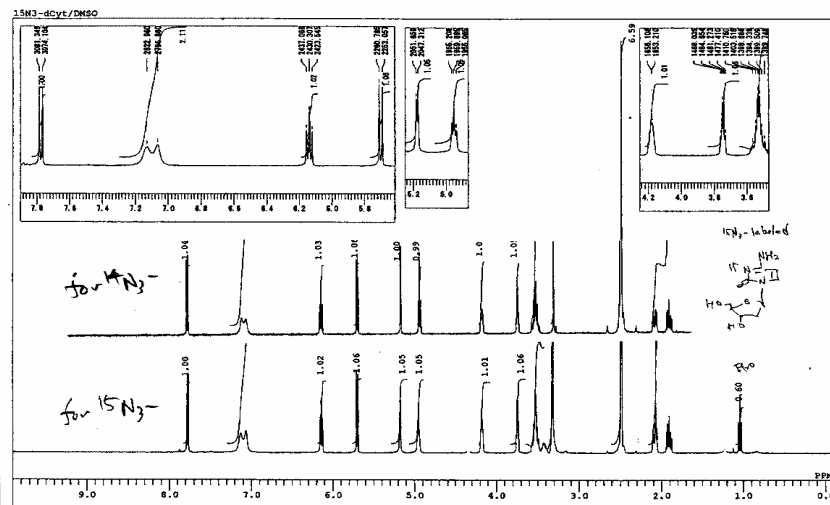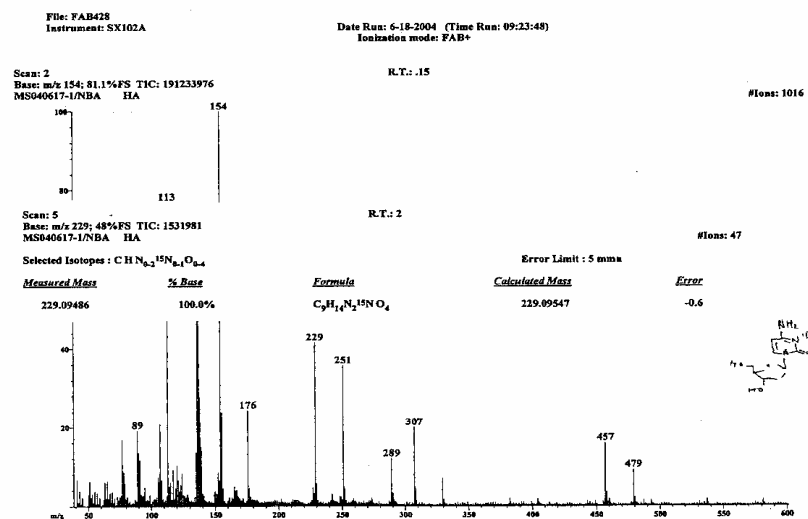

**S-10:** IR, UV,  $^1\text{H}$  NMR, FAB-Mass, and HRFAB-Mass of  $N_3$ -O-Benzylated 4-Iminouridine (**3**).

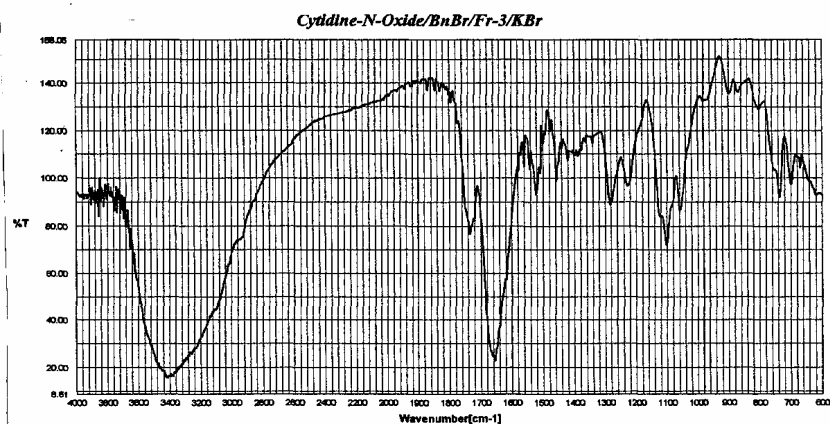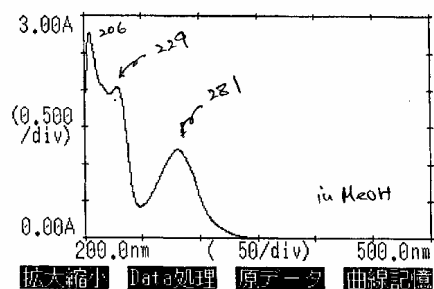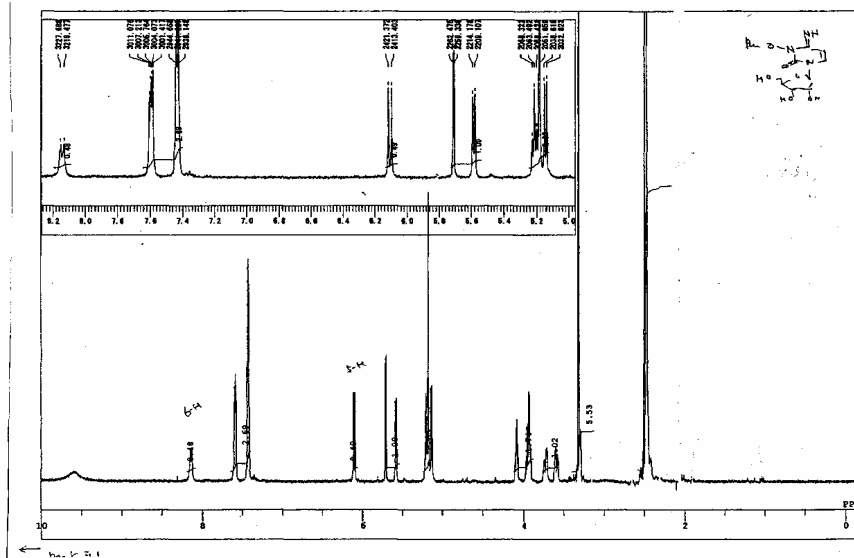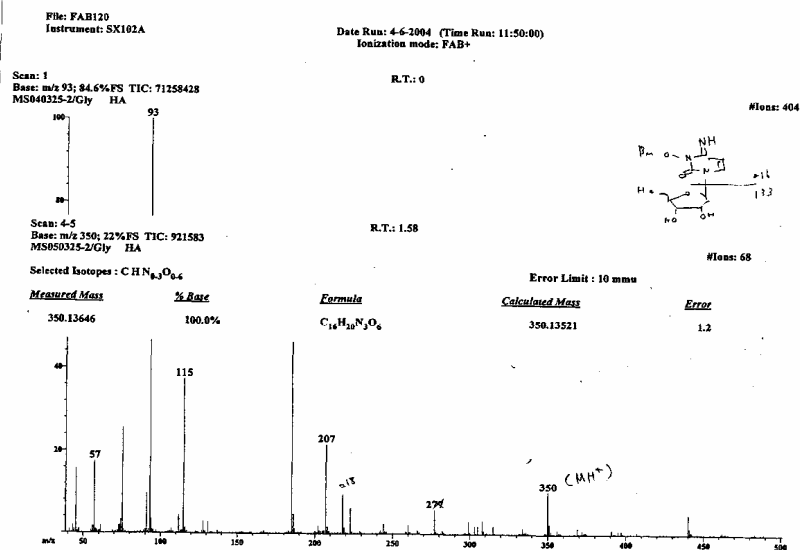

**S-11:** IR, UV,  $^1\text{H}$  NMR, FAB-Mass, and HRFAB-Mass of  $N_3$ -O-Benzylated Uridine (**4**).

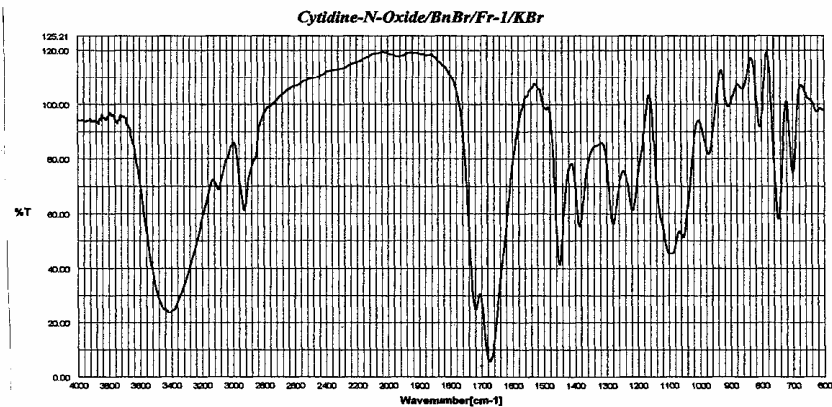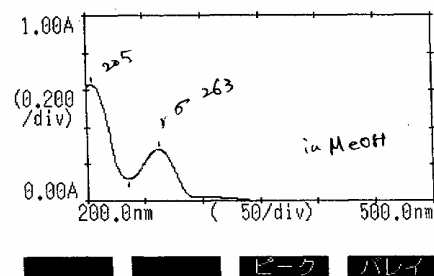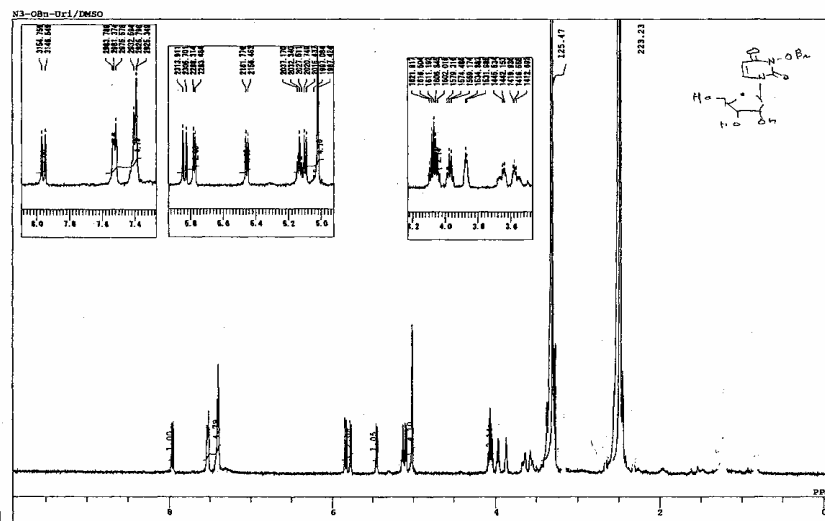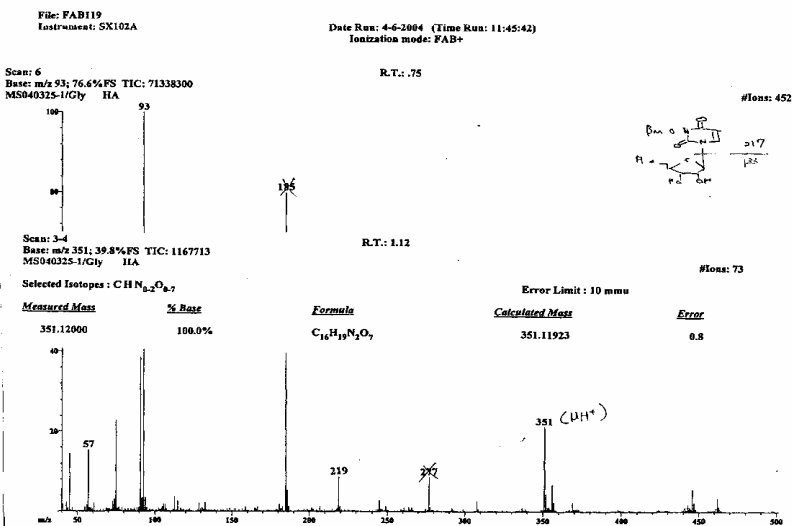

**S-12: UV,  $^1\text{H}$  NMR, FAB-Mass, and HRFAB-Mass of  $^{15}\text{N}_3$ -Labeled Uridine**

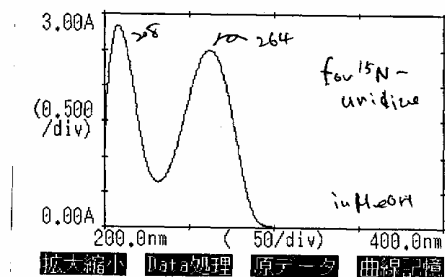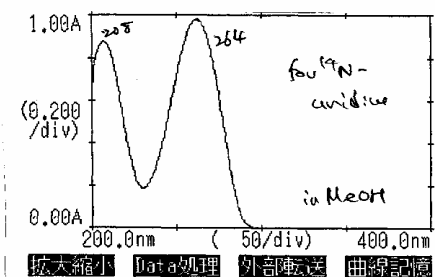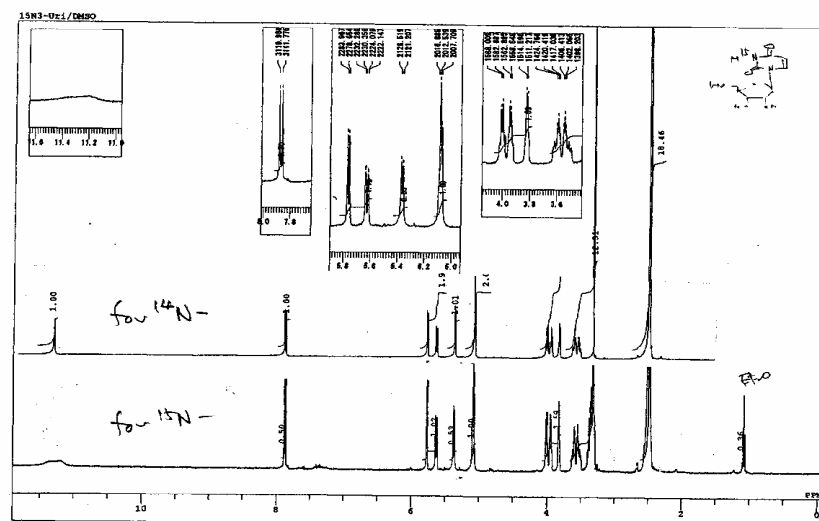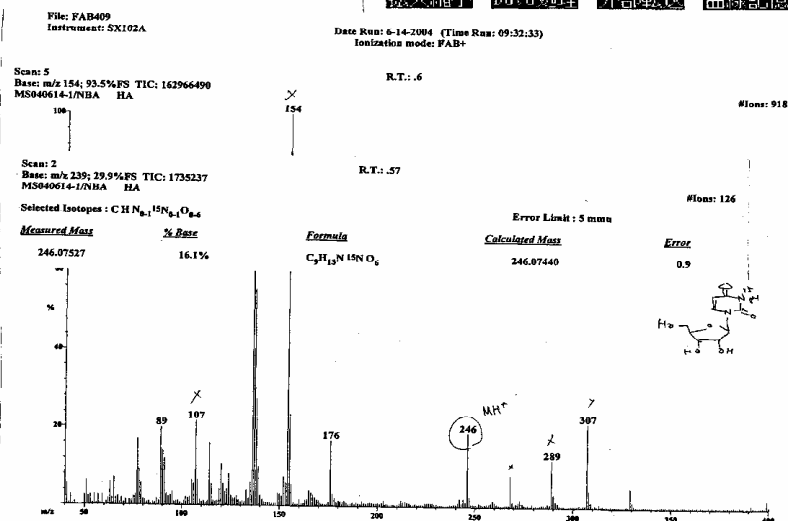

Supplement: Supplementary file 1 [file 5154709]
